# Supplementary material for: Synthesis of high-purity Li2S nanocrystals via metathesis for solid-state electrolyte applications
Source: Royal Society of Chemistry journal article supplement (doi:10.1039/d3ta00076a), 2023-01-01
Supplement: d3ta00076a1.pdf [file d3ta00076a1.pdf]

## Supporting Information

### **Synthesis of High-Purity Li<sub>2</sub>S Nanocrystals via Metathesis for Solid-State Electrolyte Applications**

William H. Smith,<sup>a</sup> Saeed Ahmadi Vaselabadi,<sup>a</sup> Colin A. Wolden<sup>a\*</sup>

*<sup>a</sup>Department of Chemical and Biological Engineering, Colorado School of Mines, Golden, CO  
United States*

*\*Email: cwolden@mines.edu*

## Supplemental Results and Discussion

While most attention has been paid to reducing the presence of oxygenated impurities in the  $\text{Li}_2\text{S}$ -m, relatively little has been focused on the NaCl that is retained due to nonzero solubility in EtOH. It is expected that due to the strong bond enthalpy of NaCl, it would be fairly inert during cell operation, though it may contribute to cell resistance due to its insulating nature. The separation efficiency of  $\text{Li}_2\text{S}$  and NaCl in EtOH is dependent on the relative solubility of the two species, with an expected concentration of  $\sim 1.5$  wt% NaCl in  $\text{Li}_2\text{S}$  at the concentrations employed here. Others have suggested reacting  $\text{Na}_2\text{S}$  with a stoichiometric excess of LiCl, to result in unreacted LiCl that suppresses NaCl dissolution via the common-ion effect.<sup>20</sup> The residual LiCl can be removed by solvent washing or used as a Cl source in the synthesis of SSEs such as  $\text{Li}_6\text{PS}_5\text{Cl}$ . However, in our case unreacted LiCl preferentially formed  $\text{Li}_3\text{OCl}$  without purification. We suggest that the common-ion effect may be more effective when combined with one of the purification strategies presented here.

We also explored the option of utilizing a longer chain alcohol – 1-propanol (PrOH) – because of its lower NaCl solubility relative to  $\text{Li}_2\text{S}$ , which could theoretically reduce the NaCl concentration to  $\sim 0.5$  wt%. We demonstrate that  $\text{Li}_2\text{S}$ -c and  $\text{Li}_2\text{S}$ -m recovered from PrOH both result in oxygenated impurities when annealed at 200 °C. However,  $\text{H}_2\text{S}$ -drying at 80 °C seems effective at suppressing these impurities as shown in XRD and FTIR. (Fig. S8-a,b) The microstructure of the  $\text{H}_2\text{S}$ -dried material recovered from PrOH appears similar to the EtOH-derived material, though with a higher degree of agglomeration. (Fig. S8-c) The relative concentrations of Na and Cl in the EtOH and PrOH materials were measured with EDAX. However, both samples showed nearly identical EDAX peak intensities (Fig. S8-d), suggesting that the actual solubility of NaCl is affected by the presence of co-solutes like  $\text{Li}_2\text{S}$ , or that Na and Cl is contributed from alternate sources, such as  $\text{Na}_2\text{S}$  or LiCl. Further work is needed to both reliably quantify and reduce the NaCl content of the  $\text{Li}_2\text{S}$ .

Finally, in a previous study we explored the use of low-purity dehydrated  $\text{Na}_2\text{S}$  ( $\text{Na}_2\text{S}$ -d) as the precursor for  $\text{Li}_2\text{S}$  formation.<sup>19</sup> The resulting  $\text{Li}_2\text{S}$  exhibited higher concentrations of  $\text{Li}_2\text{CO}_3$ , and  $\text{Li}_6\text{PS}_5\text{Cl}$  argyrodites fabricated from  $\text{Na}_2\text{S}$ -d-derived  $\text{Li}_2\text{S}$  contained crystalline  $\text{Na}_2\text{S}$ . However, the ionic conductivity of these samples was generally higher even than materials derived from battery-grade  $\text{Li}_2\text{S}$ . Figure S9 displays XRD and FTIR of  $\text{Li}_2\text{S}$  synthesized from  $\text{Na}_2\text{S}$ -d (5% excess) and LiCl in EtOH with annealing at 200 °C under Ar or at 80 °C under 10%  $\text{H}_2\text{S}$ , demonstrating that the  $\text{H}_2\text{S}$  drying may be applicable to purification even when lower purity  $\text{Na}_2\text{S}$  is employed. Such a process could represent the simplest and most economical route from  $\text{Na}_2\text{S}$  to  $\text{Li}_2\text{S}$ , since  $\text{Na}_2\text{S}$  purification steps such as hydrogen reduction or recrystallization could be avoided.

## Supplemental Figures

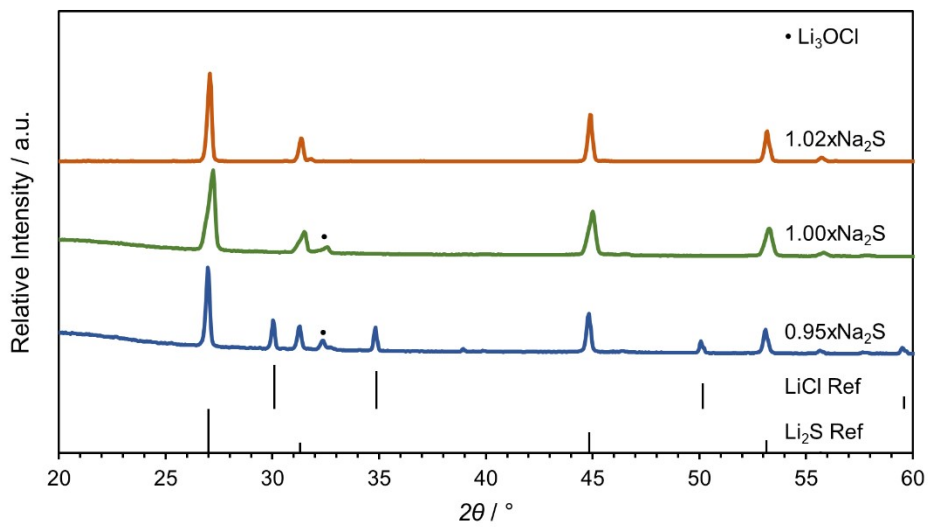

Figure S1. XRD of  $\text{Li}_2\text{S}$  dried at 250/300 °C for 12 h each after recovery from  $\text{LiCl-Na}_2\text{S}$  reactions in ethanol by solvent evaporation. Reactions were conducted by adding varying fractions of stoichiometric  $\text{Na}_2\text{S}$  to a  $\text{LiCl-EtOH}$  precursor solution and stirring for 24 h.

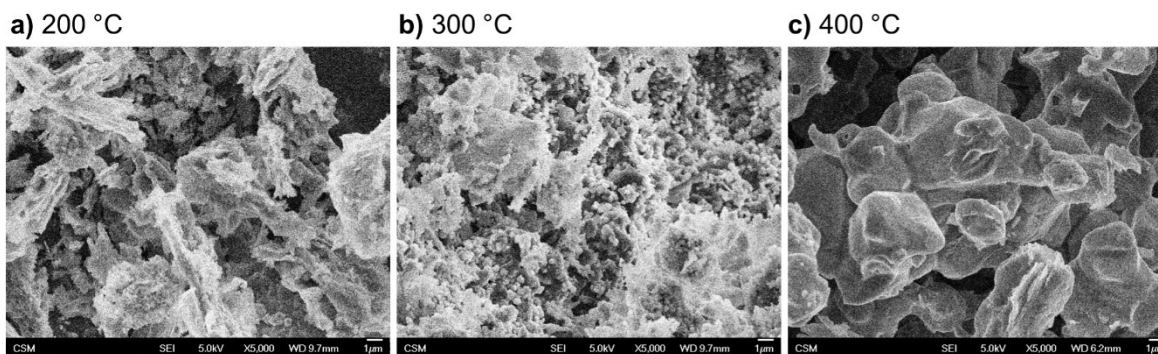

Figure S2. SEM images of  $\text{Li}_2\text{S-m}$  annealed at different temperatures under Ar.

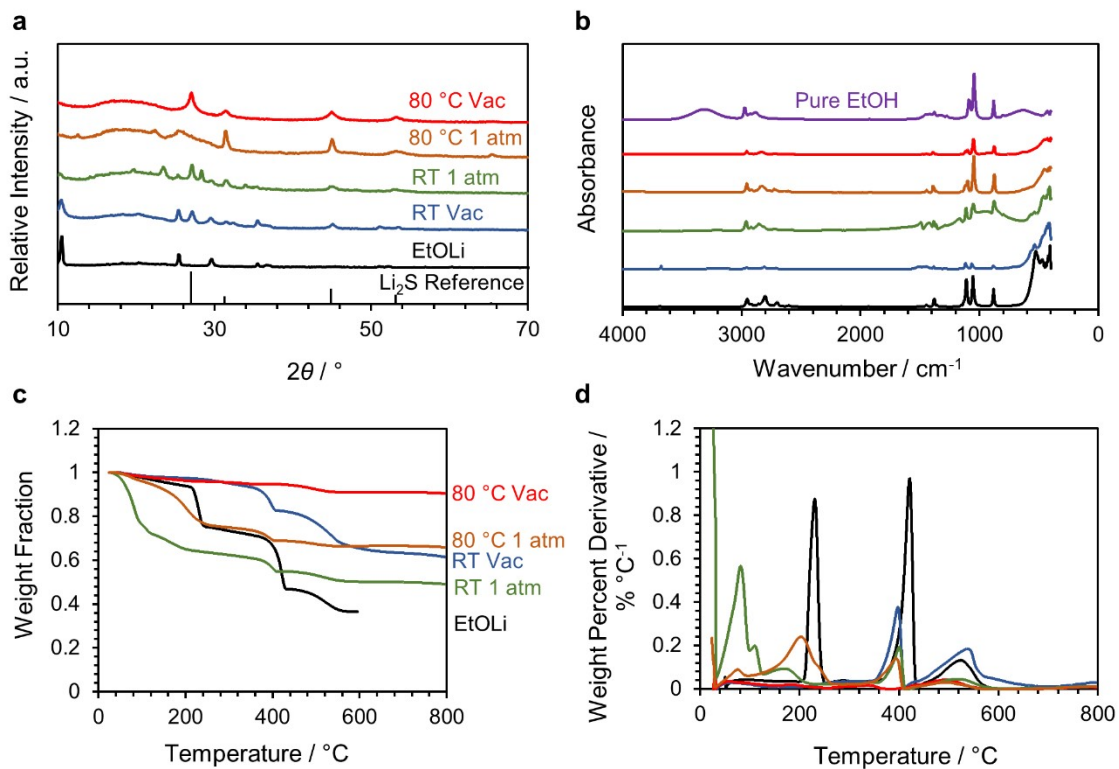

Figure S3. a) XRD, b) FTIR, c) TGA, and d) derivative of TGA of  $\text{Li}_2\text{S-c}$  recovered from EtOH under different drying conditions compared to EtOLi.

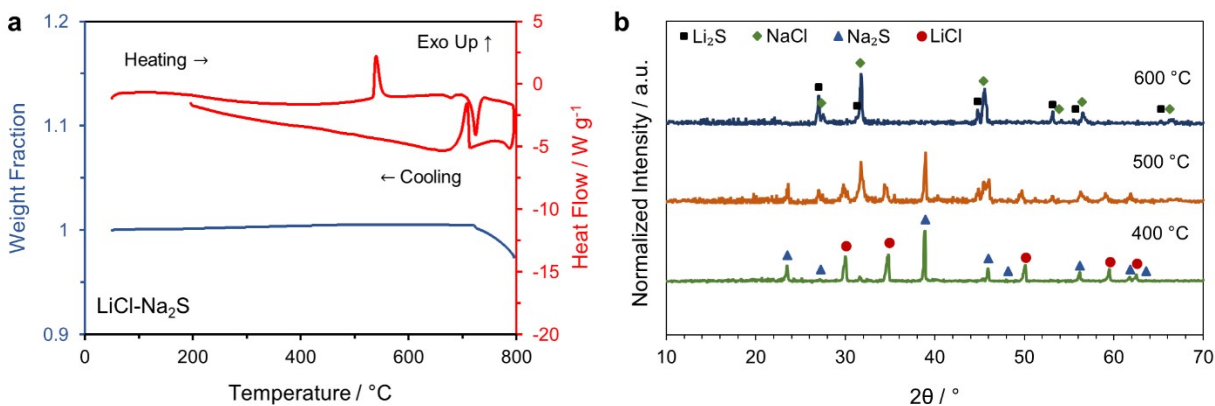

Figure S4. a) DSC/TGA of a mixture of  $\text{Na}_2\text{S}$  and  $\text{LiCl}$ . b) XRD of a mixture of  $\text{Na}_2\text{S}$  and  $\text{LiCl}$  after heating to different temperatures for 2 h under Ar.

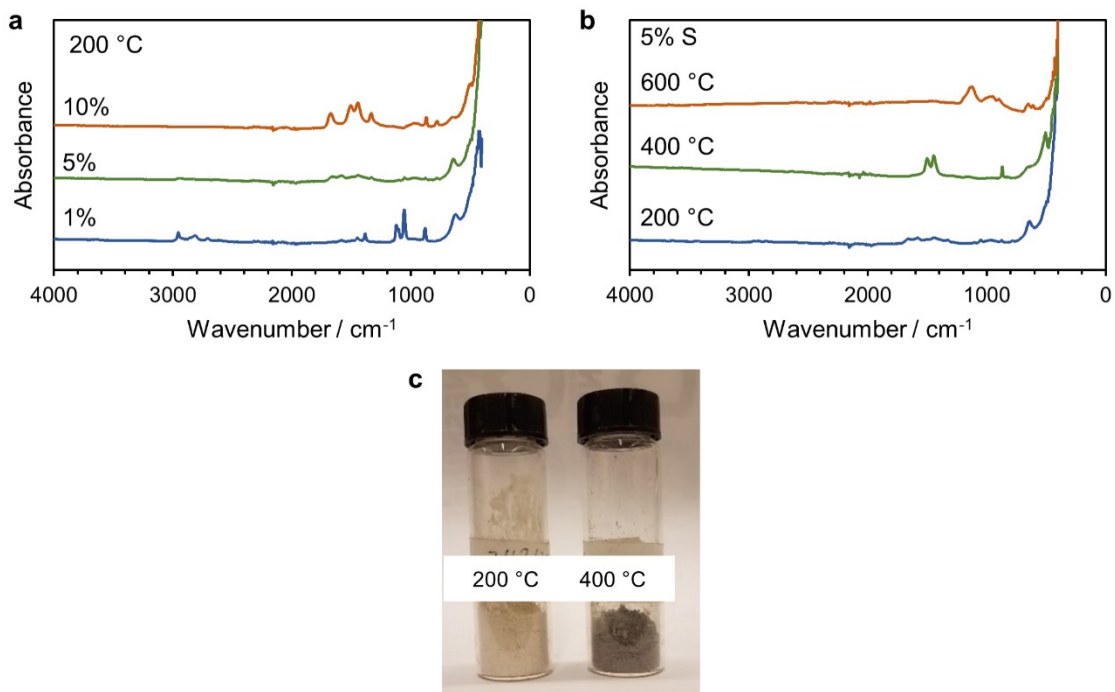

Figure S5. a) FTIR of Li<sub>2</sub>S-m annealed at 200 °C with different sulfur loadings, and b) with 5% sulfur loading at different temperatures. c) Optical images of Li<sub>2</sub>S-m at 5% sulfur loading annealed at different temperatures.

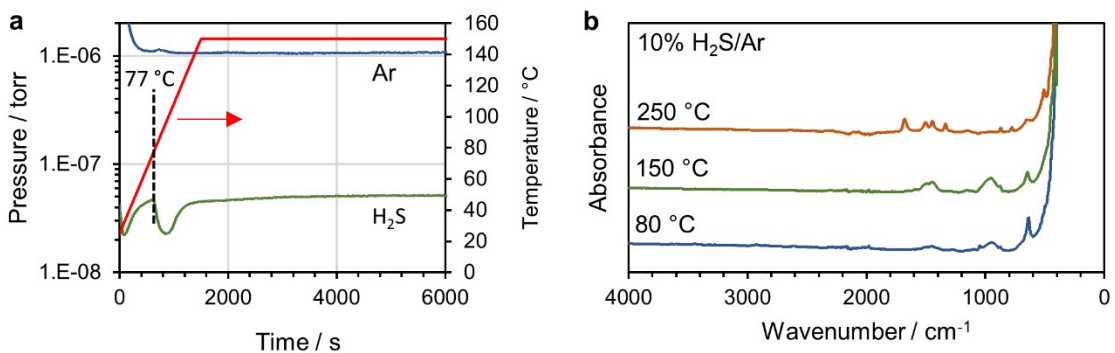

Figure S6. a) On-line mass spectrometry of effluent from Li<sub>2</sub>S-m under 10% H<sub>2</sub>S in Ar during heating. Ar ( $m/z = 40$ ) and H<sub>2</sub>S ( $m/z = 34$ ) b) FTIR of Li<sub>2</sub>S-m heated to different temperatures under 10% H<sub>2</sub>S in Ar.

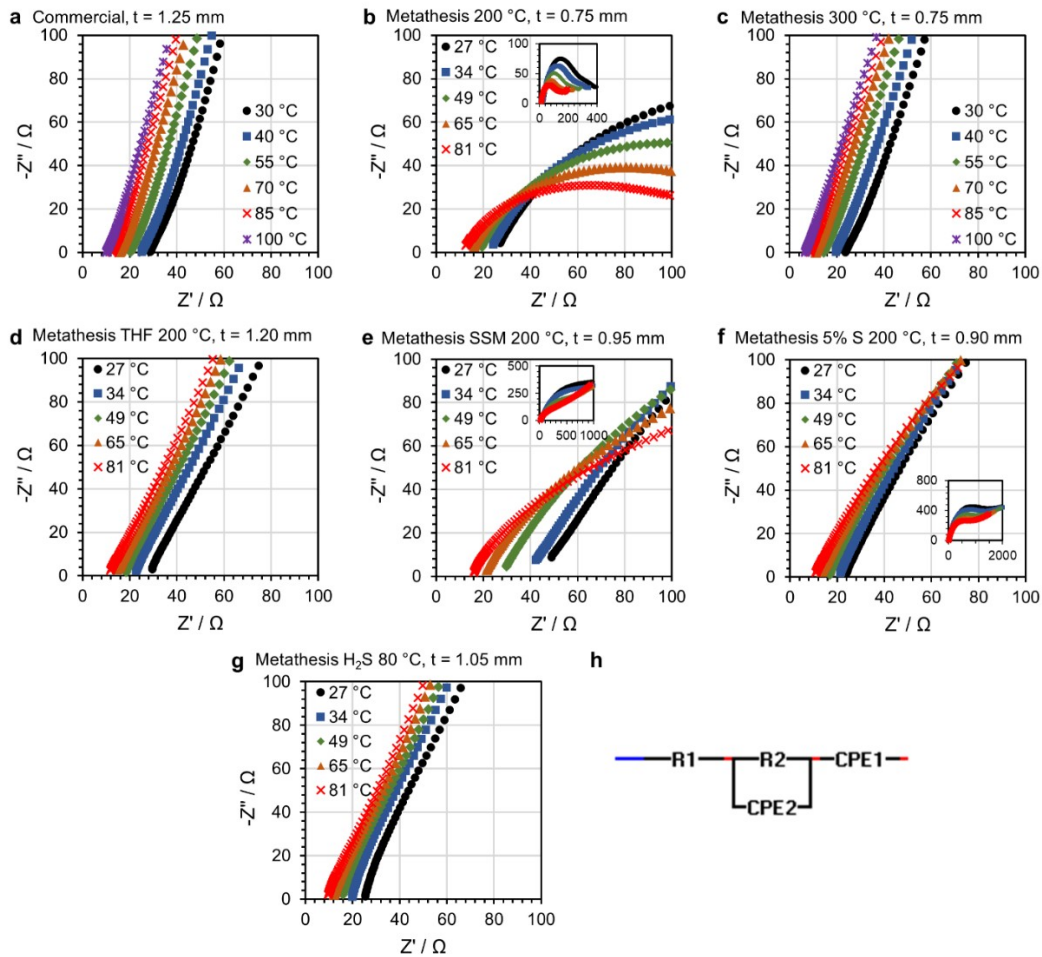

Figure S7. a-g) Nyquist plots at different temperatures of  $\text{Li}_6\text{PS}_5\text{Cl}$  argyrodites fabricated from different  $\text{Li}_2\text{S}$  samples. Insets display fuller scale to showcase semicircles when observed. h) Equivalent circuit used for fitting data in e and f. For fitting data in b, an additional RQ element was added in series.

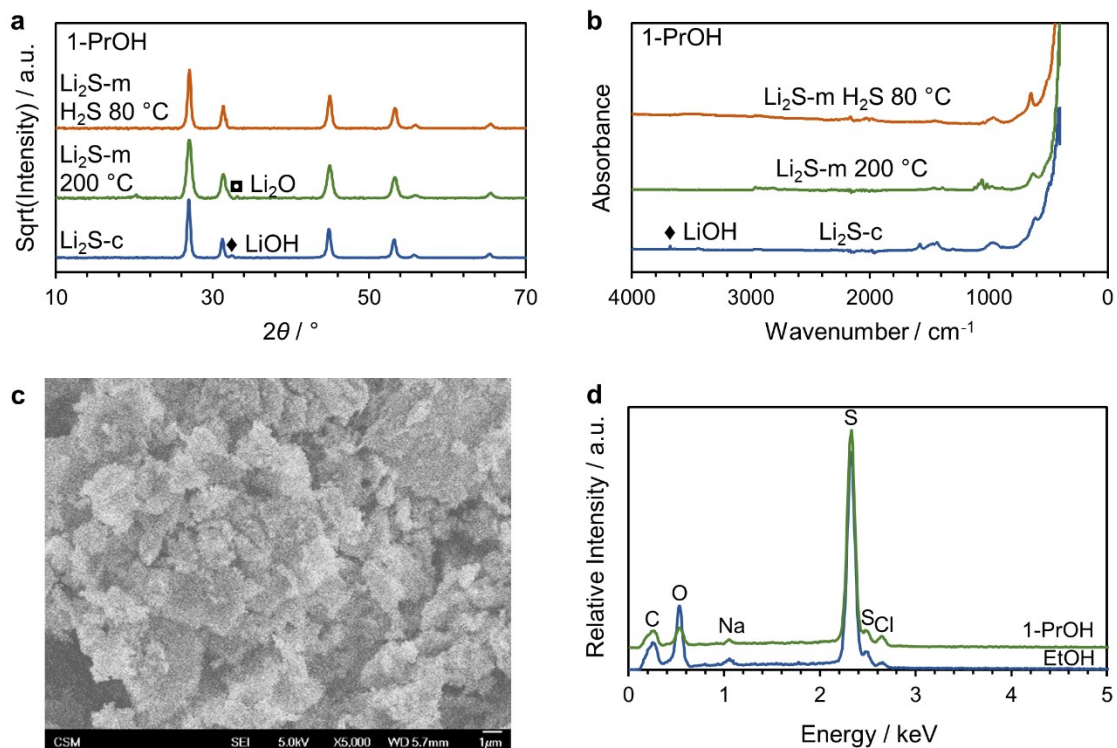

Figure S8. a) XRD and b) FTIR of Li<sub>2</sub>S-c and Li<sub>2</sub>S-m recovered from PrOH. c) SEM image of Li<sub>2</sub>S-m recovered from PrOH with drying under H<sub>2</sub>S at 80 °C. d) EDAX spectra of Li<sub>2</sub>S-m recovered from EtOH or PrOH with drying under H<sub>2</sub>S at 80 °C.

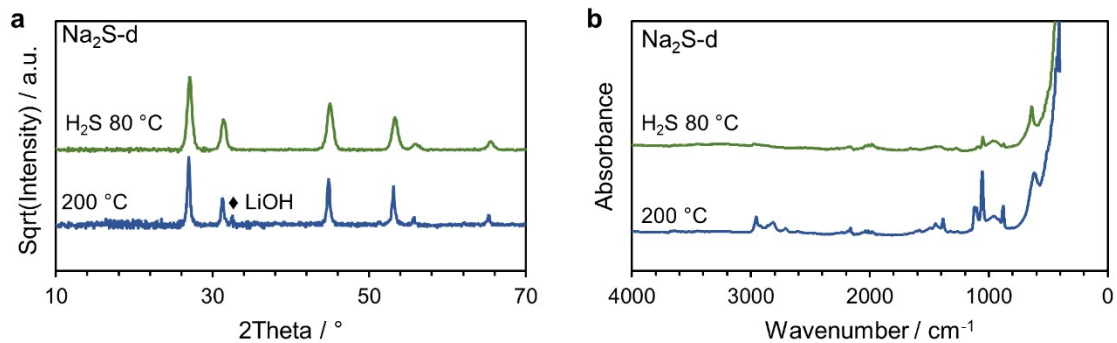

Figure S9. a) XRD and b) FTIR of Li<sub>2</sub>S-m derived from Na<sub>2</sub>S-d with annealing at 200 °C under Ar or drying at 80 °C under 10% H<sub>2</sub>S in Ar.
